# Supplementary material for: The Origins and Historical Assembly of the Brazilian Caatinga Seasonally Dry Tropical Forests
Source: Frontiers journal article supplement (doi:10.3389/fevo.2022.723286), 2022-02-24
Supplement: Table_1.XLSX [file Table_1.XLSX]

## Sheet: S1_selected_lineages
lineage	family	DNA regions	references
Amorimia	Malpighiaceae	ITS, ETS, ndhF, rpl16, trnQ-rps16, trnL-F, trnT-L	Almeida et al., 2018
Bombacoids	Malvaceae	ITS, ETS, matK, trnL-trnF, trnS-trnG	Carvalho-sobrinho et al., 2016
Brongniartieae	Leguminosae	ITS, matK-trnK, trnL	Cardoso et al., 2017
Caesalpinia s.l.	Leguminosae	ITS, matK-trnK, rps16, trnD-trnT, trnL-trnF, ycf6-psbM	Gagnón et al., 2016
Calliandra	Leguminosae	ITS, trnL	Souza et al., 2013
Cereus	Cactaceae	phyC, trnS-trnG	Franco et al., 2017
Cnidoscolus	Euphorbiaceae	ITS, psbA-trnH, trnL-trnF	Maya-Lastra and Steinmann, 2020
Coursetia	Leguminosae	ITS	Queiroz and Lavin, 2011
Cryptanthoids	Bromeliaceae	agt1, ETS, matK, phyC, trnH-psbA, ycf1_1, ycf1_6	Leme et al., 2017
Ficus sect. Americanae	Moraceae	ITS, ETS, G3pdh, At103, Tpi	Machado et al., 2018
Harrisia	Cactaceae	isi1, nhx1, atpB-rbcL, rpl16	Franck et al., 2013
Leuenbegeria	Cactaceae	phyC, rbcL, psbA-trnH, trnK-matK, cox3	Edwards et al., 2005
Manihot	Euphorbiaceae	G3pdh, NIA-i3, trnC-D	Duputié et al., 2011
Marsdenia	Apocynaceae	ITS, ETS, trnL-F, psbD-trnT	Espírito-Santo et al., 2019
Martyniaceae	Martyniaceae	ITS, trnH-psbA, trnQ-rps16, trnS-trnG	Gutierrez, 2011
Mimosa	Leguminosae	trnD-trnT	Simon et al., 2011
Pereskia	Cactaceae	phyC, rbcL, psbA-trnH, trnK-matK, cox3	Edwards et al., 2005
Piptadenia	Leguminosae	ITS, matK-trnK, trnL-trnF, trnD-trnT, trnL-F	Ribeiro et al., 2018
Pterocarpus	Leguminosae	ITS, trnL-F	Saslis-Lagoudakis et al., 2011
Vataireoids	Leguminosae	ITS, matK-trnK, trnL, rps16, trnD-T, psbA-trnH, trnQ	Cardoso et al., 2013; Cruz et al., 2019
