# Supplementary material for: The Origins and Historical Assembly of the Brazilian Caatinga Seasonally Dry Tropical Forests
Source: Frontiers journal article supplement (doi:10.3389/fevo.2022.723286), 2022-02-24
Supplement: Table_2.XLSX [file Table_2.XLSX]

## Sheet: Amorimia
species	BioGeoBEARS?	ETS	ITS	ndhF	rpl16	trnQ-rps16	trnL-F	trnT-L
Amorimia amazonica	yes	KR092914	KR092933	HQ246739.1	–	KY421904	–	KR259149.1
Amorimia andersonii	yes	KR092924	KR092944	–	KR092964	KR092978	KR259145.1	–
Amorimia camporum	yes	KR092915	KR092934	HQ246740.1	KR092958	KY421905	–	–
Amorimia candidae	yes	KR092920	KR092941	KY271741	KR092960	KR092974	KR259143.1	KR259153.1
Amorimia concinna	yes	–	KR092935	–	–	KY421906	KR259141.1	–
Amorimia coriacea	yes	KR092922	KR092942	KR092951	KR092962	KR092976	KR259144.1	–
Amorimia exotropica	yes	KR092923	KR092943	HQ246741.1	KR092963	KR092977	–	–
Amorimia kariniana	yes	–	KR092936	HQ246742.1	KY421898	–	–	–
Amorimia maritima	yes	KR092925	KR092945	KM197313.1	KR092965	KR092979	–	–
Amorimia pellegrinii	yes	KR092926	KR092946	KY271742	KR092966	KR092980	KR259146.1	KR259154.1
Amorimia pubiflora	yes	KR092916	KR092937	KY421894	KY421899	KY421907	–	KR259150.1
Amorimia rigida	yes	KR092928	KR092948	KY421895	KR092968	KR092982	–	KR259155.1
Amorimia septentrionalis	yes	KR092918	KR092939	KM197314.1	KR092959	KR092973	KR259142.1	KR259151.1
Amorimia tumida	yes	KY368391	KY421910	–	–	–	–	–
Amorimia velutina	yes	KR092930	KR092950	HQ246743.1	–	KR092984	KR259147.1	–
Diplopterys pubipetala	no	KR092986	KY421908	HQ246821.1	KY421896	KY421900	–	–
Ectopopterys soejartoi	no	KR092910	–	AF351064.1	KR092953	KY421903	KR259148.1	KR259148.1
Mascagnia australis	no	–	KR092931	HQ246886.1	KR092954	KR092970	–	–
Mascagnia cordifolia	no	KR092911	–	HQ246888.1	KR092955	KR092971	–	–
Mascagnia divaricata	no	KR092912	KR092932	HQ246890.1	KR092956	KR092972	–	–
Mascagnia sepium	no	KR092913	AF436789.1	AF351025.1	KR092957	–	–	–
Peixotoa hispidula	no	KR093002	KR093014	KM197421.1	KY421897	KY421902	–	–
Stigmaphyllon paralias	no	KR054593	KY421909	AF351065.1	–	KY421901	–	–

## Sheet: Bombacoids
species	BioGeoBEARS?	ETS	ITS	matK	trnL-trnF	trnS-trnG
Adansonia digitata	no	KM453023	HQ658372	AY321168	HQ696738	-
Adansonia za	no	-	AF028536	HQ696689	HQ696741	-
Aguiaria excelsa	no	KM453024	KM453161	-	-	KM453109
Bernoullia flammea	no	KM453027	HQ658366	HQ696685	HQ696732	-
Bombax buonopozense	no	KM453025	HQ658376	AY321171	HQ696742	-
Bombax ceiba	no	KM453026	KM453163	HQ696690	HQ696743	KM453109
Catostemma albuquerquei	no	KM453028	KM453165	-	-	KM453111
Catostemma fragrans	no	KM453029	HQ658370	AY589069	HQ696736	KM453121
Catostemma milanezii	no	KM453030	KM453166	-	-	-
Cavanillesia chicamochae	no	KM245242	-	-	KM488630	-
Cavanillesia platanifolia	no	KM453031	HQ658371	HQ696686	HQ696737	-
Cavanillesia umbellata	no	KM453032	-	-	-	-
Ceiba aesculifolia	yes	KM453033	HQ658384	HQ696699	HQ696751	-
Ceiba crispiflora	yes	KM453035	HQ658387	AY321169	HQ696754	-
Ceiba erianthos	yes	KM453036	KM453167	-	-	KM453113
Ceiba glaziovii	yes	KM453037	-	-	-	KM453116
Ceiba jasminodora	yes	KM453039	KM453168	-	-	KM453131
Ceiba pentandra	yes	KM453040	KM453169	HQ696701	HQ696753	KM453117
Ceiba pubiflora	yes	KM453041	KM453170	-	-	KM453118
Ceiba rubriflora	yes	KM453042	KM453171	-	-	KM453119
Ceiba schottii	yes	-	HQ658389	HQ696703	HQ696756	-
Ceiba speciosa	yes	KM453044	HQ658388	HQ696702	HQ696755	-
Ceiba ventricosa	yes	KM453045	KM453172	-	-	-
Chiranthodendron pentadactylon	no	KM453046	HQ658356	AY321164	HQ696722	-
Eriotheca candolleana	yes	-	HQ658394	HQ696718	HQ696772	KM453120
Eriotheca dolichopoda	yes	KM453048	KM453174	HQ696719	HQ696773	KM453123
Eriotheca gracilipes	yes	KM453050	-	HQ696708	HQ696762	KM453124
Eriotheca longipedicellata	yes	-	-	HQ696716	HQ696770	-
Eriotheca longitubulosa	yes	-	-	HQ696717	HQ696771	-
Eriotheca macrophylla	yes	KM453051	KM453175	HQ696713	HQ696767	KM453108
Eriotheca obcordata	yes	-	HQ658403	-	HQ696774	-
Eriotheca parvifolia	yes	KM453053	HQ658401	HQ696710	HQ696764	KM453126
Eriotheca pentaphylla	yes	-	-	HQ696768	HQ696714	-
Eriotheca pubescens	yes	KM453054	HQ658397	HQ696709	HQ696763	KM453127
Eriotheca roseorum	yes	-	-	HQ696765	HQ696711	-
Eriotheca ruizii	yes	-	-	HQ696777	HQ696721	-
Eriotheca surinamensis	yes	-	HQ658400	HQ696715	HQ696769	-
Fremontodendron californicum	no	KM453056	HQ658357	AY321165	HQ696723	KM453114
Gyranthera caribensis	no	-	HQ658368	AY589071	HQ696734	KM453110
Huberodendron patinoi	no	KM453057	HQ658367	AY589072	HQ696733	-
Huberodendron swietenioides	no	-	KM453162	-	-	KM453129
Ochroma pyramidale	no	KM453058	HQ658363	AY321172	HQ696729	KM453132
Pachira aquatica	yes	KM453059	-	AY321170	HQ696759	KM453133
Pachira brevipes	yes	KM453060	HQ658391	HQ696694	-	KM453139
Pachira endecaphylla	yes	KM453061	KM453182	-	-	KM453134
Pachira flaviflora	yes	-	HQ658379	HQ696693	HQ696746	-
Pachira glabra	yes	KM453062	HQ658393	HQ696706	HQ696761	KM453135
Pachira gracilis	yes	KM453063	-	-	-	-
Pachira insignis	yes	KM453064	HQ658390	HQ696704	HQ696757	KM453136
Pachira moreirae	yes	KM453065	KF477294	-	-	KM453138
Pachira retusa	yes	KM453066	KF477293	-	-	KM453140
Patinoa sphaerocarpa	no	-	HQ658364	AY589074	HQ696730	-
Pentaplaris doroteae	no	-	HQ658358	AY321163	HQ696724	KM453115
Pseudobombax calcicola	yes	KM453080	KM453187	-	-	KM453144
Pseudobombax campestre	yes	KM453081	KM453188	-	-	KM453145
Pseudobombax croizatii	yes	-	HQ658382	HQ696697	HQ696749	-
Pseudobombax ellipticum	yes	KM453083	KM453190	-	-	KM488632
Pseudobombax grandiflorum	yes	KM453085	KM453191	HQ696698	HQ696750	KM453148
Pseudobombax longiflorum	yes	KM453087	KM453194	-	-	KM453149
Pseudobombax marginatum	yes	KM453089	KM453197	HQ696696	HQ696748	KM453147
Pseudobombax mininum	yes	KM453091	KM453199	-	-	KM453152
Pseudobombax munguba	yes	KM453092	KM453200	-	-	KM453153
Pseudobombax parvifolium	yes	KM453094	KM453201	-	-	KM453154
Pseudobombax septenatum	yes	KM453098	-	-	-	-
Pseudobombax simplicifolium	yes	KM453099	KM453204	-	-	KM453156
Pseudobombax tomentosum	yes	KM488627	KM453207	-	-	KM453157
Rhodognaphalon schumannianum	no	-	HQ658380	HQ696695	HQ696747	-
Scleronema micranthum	no	KM453102	HQ658369	AY589070	HQ696735	KM453158
Scleronema praecox	no	KM453103	-	-	-	KM453159
Septotheca tessmannii	no	KM453104	HQ658365	AY589073	HQ696731	-
Spirotheca elegans	yes	KM453105	KM453208	-	-	-
Spirotheca rivierii	yes	KM453106	KM453209	-	-	-
Spirotheca rosea	yes	KM453107	HQ658378	HQ696691	HQ696744	-

## Sheet: Brongniartieae
species	BioGeoBEARS?	ITS	matK-trnK	trnL
Amphiodon effusus	yes	KX652250	KX652219	KX584391
Behaimia cubensis	yes	KX652251	KX652220	KX652194
Bowdichia nitida	no	JX124477	JX124395	JX124433
Bowdichia virgilioides	no	JX124476	JX124393	AF309486
Brongniartia alamosana	yes	AF467022	AF142688	-
Brongniartia inconstans	yes	GQ250075	GQ246146	-
Brongniartia lupinoides	yes	-	GQ246149	-
Brongniartia magnibracteata	yes	AF287652	-	-
Brongniartia peninsularis	yes	GQ250076	GQ246148	-
Brongniartia pringlei	yes	AF204710	GQ246150	-
Brongniartia riesebergii	yes	AF204709	-	-
Brongniartia sousae	yes	KX652252	KX652221	KX652195
Brongniartia ulbrichiana	yes	KX652253	GQ246145	KX652196
Cristonia biloba	yes	AF204703	-	-
Cyclolobium brasiliense	yes	AF287637	KX652222	KX652197
Diplotropis incexis	no	JX124486	JX124401	JX124440
Diplotropis martiusii	no	JX124484	AY386938	JX124438
Haplormosia monophylla	no	KX584396	KX584405	KX584377
Harpalyce arborescens	yes	KX652254	AF142689	KX652198
Harpalyce brasiliana	yes	KX652255	KX652223	KX584388
Harpalyce formosa	yes	KX652256	GQ246154	KX652200
Harpalyce hilariana	yes	KJ028469	KX584414	KX584386
Harpalyce lanata	yes	GQ250077	KX584415	KX584387
Harpalyce magnibracteata	yes	KX652257	KX652226	KX652201
Harpalyce parvifolia	yes	KX652258	KX584416	KX652202
Harpalyce pringlei	yes	GQ250078	KX652228	-
Hovea acanthoclada	yes	KX652259	KX652229	KX652203
Hovea arnhemica	yes	AF204692	-	-
Hovea chorizemifolia	yes	KX652260	KX652230	KX652204
Hovea elliptica	yes	AF287640	-	KX652205
Hovea linearis	yes	AF204694	-	-
Hovea longipes	yes	AF204695	-	-
Hovea pungens	yes	AF204697	KX652231	KX652206
Hovea purpurea	yes	-	AY386889	-
Hovea trisperma	yes	AF287639	KX652232	KX652207
Lamprolobium fruticosum	yes	GQ250080	GQ246159	-
Lamprolobium grandiflorum	yes	AF204699	-	-
Leptolobium dasycarpum	no	JX124496	JX124408	JX124450
Leptolobium panamense	no	JX124498	AF142684	AF208891
Limadendron amazonicum	yes	KJ028465	KJ028456	-
Limadendron hostmannii	yes	KJ028466	KJ028455	-
Plagiocarpus axillaris	yes	AF204700	GQ246160	-
Plagiocarpus conduplicatus	yes	KX652261	KX652233	KX652208
Poecilanthe falcata	yes	AF467492	GQ246155	KX652209
Poecilanthe grandiflora	yes	KX652262	KX584409	KX584381
Poecilanthe itapuana	yes	KJ028462	KJ028458	KX652210
Poecilanthe parviflora	yes	AF187089	AF142687	AF208897
Poecilanthe subcordata	yes	GQ250082	KX652240	KX584393
Poecilanthe ulei	yes	KJ028468	KJ028460	KX652211
Tabaroa caatingicola	yes	GQ250083	GQ246161	KX652212
Templetonia egena	yes	HM116997	KX652245	KX652213
Templetonia hookeri	yes	GQ250085	GQ246157	KX652214
Templetonia neglecta	yes	AF204706	KX652246	KX652215
Templetonia retusa	yes	AF287636	GQ246158	KX584380
Templetonia stenophylla	yes	AF204705	KX652247	KX652216
Templetonia sulcata	yes	AF287635	KX652248	AF518122
Thinicola incana	yes	KX652263	KX652249	KX652217

## Sheet: Calliandra
species	BioGeoBEARS?	ITS	trnL-trnF
Abarema floribunda	no	JX870654	JX870786
Abarema piresii	no	JX870655	JX870787
Acacia spinescens	no	AF360700	AF19706
Afrocalliandra gilbertii	no	JX870690	-
Afrocalliandra redacta	no	JX870732	JX870853
Albizia polycephala	no	JX870656	JX870788
Archidendron hirsutum	no	-	AF365042.1
Balizia pedicellaris	no	JX870657	JX870799
Blanchetiodendron blanchetii	no	JX870658	JX870790
Calliandra aeschynomenoides	yes	JX870659	JX870790
Calliandra angustifolia	yes	JX870660	JX870792
Calliandra asplenioides	yes	JX870661	JX870793
Calliandra bahiana	yes	JX870664	JX870796
Calliandra belizensis	yes	JX870665	-
Calliandra bella	yes	JX870666	JX870797
Calliandra biflora	yes	JX870667	JX870798
Calliandra blanchetii	yes	JX870668	JX870799
Calliandra brenesii	yes	JX870669	JX870800
Calliandra brevicaulis	yes	JX870670	JX870801
Calliandra brevipes	yes	JX870671	JX870802
Calliandra caeciliae	yes	JX870674	JX870803
Calliandra californica	yes	JX870672	-
Calliandra calycina	yes	JX870673	JX870804
Calliandra chilensis	yes	JX870675	-
Calliandra coccinea	yes	JX870676	JX870805
Calliandra coriacea	yes	JX870677	JX870806
Calliandra crassipes	yes	JX870678	JX870807
Calliandra cruegeri	yes	JX870679	JX870808
Calliandra cumbucana	yes	JX870680	JX870809
Calliandra debilis	yes	JX870681	JX870810
Calliandra depauperata	yes	JX870682	JX870811
Calliandra dolichopoda	yes	JX870683	-
Calliandra dysantha	yes	JX870684	JX870813
Calliandra eriophylla	yes	JX870685	-
Calliandra erubescens	yes	JX870686	JX870812
Calliandra fasciculata	yes	JX870687	JX870814
Calliandra feioana	yes	JX870688	-
Calliandra gardneri	yes	-	JX870816
Calliandra glomerulata	yes	JX870691	JX870817
Calliandra glyphoxylon	yes	-	JX870819
Calliandra goldmanii	yes	JX870692	JX870818
Calliandra guildingii	yes	JX870693	JX870820
Calliandra haematocephala	yes	JX870694	JX870821
Calliandra haematomma	yes	JX870695	JX870822
Calliandra harrisii	yes	JX870696	JX870823
Calliandra hintonii	yes	JX870697	JX870824
Calliandra hirsuta	yes	JX870698	-
Calliandra hirtiflora	yes	JX870699	JX870825
Calliandra houstoniana	yes	JX870700	JX870826
Calliandra humilis	yes	JX870701	-
Calliandra hygrophila	yes	JX870702	JX870827
Calliandra iligna	yes	JX870703	JX870828
Calliandra juzepczukii	yes	-	JX870829
Calliandra laevis	yes	JX870704	JX870830
Calliandra lanata	yes	JX870705	JX870831
Calliandra laxa	yes	JX870706	JX870832
Calliandra leptopoda	yes	JX870708	JX870833
Calliandra lintea	yes	JX870709	JX870834
Calliandra longipes	yes	JX870710	JX870835
Calliandra longipinna	yes	JX870711	JX870836
Calliandra luetzelburgii	yes	JX870712	JX870837
Calliandra macrocalyx	yes	JX870713	JX870838
Calliandra magdalenae	yes	JX870714	JX870839
Calliandra molinae	yes	JX870715	JX870840
Calliandra mollissima	yes	JX870716	JX870841
Calliandra mucugeana	yes	JX870717	JX870842
Calliandra nebulosa	yes	JX870718	JX870843
Calliandra paganuccii	yes	JX870720	-
Calliandra palmeri	yes	JX870721	-
Calliandra parviflora	yes	JX870722	JX870844
Calliandra parvifolia	yes	JX870724	JX870845
Calliandra paterna	yes	JX870725	JX870846
Calliandra pedicellata	yes	JX870726	JX870847
Calliandra peninsularis	yes	-	JX870848
Calliandra physocalyx	yes	JX870727	-
Calliandra pilgerana	yes	JX870728	JX870849
Calliandra pittieri	yes	JX870729	JX870850
Calliandra purdiei	yes	JX870730	JX870851
Calliandra purpurea	yes	JX870731	JX870852
Calliandra renvoizeana	yes	JX870733	JX870854
Calliandra rhodocephala	yes	JX870734	-
Calliandra riparia	yes	JX870735	-
Calliandra rubescens	yes	JX870736	JX870855
Calliandra semisepulta	yes	JX870737	JX870856
Calliandra sessilis	yes	JX870738	JX870857
Calliandra silvicola	yes	JX870739	JX870858
Calliandra sincorana	yes	JX870740	JX870859
Calliandra sp.	yes	JX870742	JX870861
Calliandra sp.	yes	JX870743	-
Calliandra sp.	yes	JX870744	JX870863
Calliandra sp.	yes	JX870746	JX870864
Calliandra sp.	yes	JX870745	JX870862
Calliandra spinosa	yes	JX870741	JX870860
Calliandra surinamensis	yes	JX870747	JX870865
Calliandra taxifolia	yes	JX870748	JX870866
Calliandra tehuantepecensis	yes	JX870761	JX870877
Calliandra tergemina	yes	JX870749	JX870867
Calliandra trinervia	yes	-	AF278516
Calliandra tsugoides	yes	JX870750	-
Calliandra tumbeziana	yes	JX870751	JX870868
Calliandra tweedii	yes	JX870752	-
Calliandra ulei	yes	JX870689	JX870815
Calliandra umbellifera	yes	JX870753	JX870869
Calliandra vaupesiana	yes	JX870754	JX870870
Calliandra virgata	yes	JX870755	JX870871
Calliandra viscidula	yes	JX870756	JX870872
Cedrelinga cateniformis	no	JX870757	JX870873
Cojoba arborea	no	JX870758	JX870874
Cojoba catenata	no	-	AY944538.1
Cojoba rufescens	no	EF638187	-
Ebenopsis ebano	no	JX870759	JX870875
Enterolobium timbouva	no	JX870760	JX870876
Havardia mexicana	no	JX870762	JX870878
Hydrochorea corymbosa	no	JX870763	JX870879
Inga edulis	no	JX870764	JX870880
Inga thibaudiana	no	JX870765	JX870881
Leucochloron limae	no	JX870766	JX870882
Macrosamanea pubiramea	no	JX870767	JX870883
Pithecellobium diversifolium	no	JX870768	JX870884
Pseudosamanea guachapele	no	JX870769	JX870885
Samanea saman	no	JX870770	JX870886
Sphinga acatlensis	no	JX870771	JX870887
Thailentadopsis nitida	no	JX870772	JX870888
Thailentadopsis tenuis	no	-	JX870889
Viguieranthus ambongensis	no	JX870773	JX870890
Viguieranthus densinervus	no	JX870774	JX870891
Viguieranthus glaber	no	JX870775	JX870892
Viguieranthus kony	no	JX870776	-
Viguieranthus megalophyllus	no	JX870777	-
Viguieranthus subauriculatus	no	JX870778	-
Zapoteca alinae	no	JX870779	JX870893
Zapoteca filipes	no	JX870780	JX870896
Zapoteca formosa	no	JX870781	JX870897
Zapoteca lambertiana	no	JX870782	JX870894
Zapoteca media	no	-	JX870895
Zapoteca sousae	no	JX870783	JX870898
Zapoteca tetragona	no	JX870784	JX870899
Zygia racemosa	no	JX870785	JX870900

## Sheet: Cereus
species	BioGeoBEARS?	trnS-trnG	phyC
Arrojadoa rhodantha	no	KP017417	KM888778
Blossfeldia liliputana	no	-	AY875301
Brasilopunpia brasiliensis	no	-	HQ621081
Browningia hertlingiana	no	JQ779526	-
Cereus aethiops	yes	KP017434	-
Cereus albicaulis	yes	KP017442	KM888762
Cereus bicolor	yes	KP017426	KM888767
Cereus braunii	yes	KP017428	-
Cereus fernambucensis fernambucensis	yes	KP017430	KM888770
Cereus fernambucensis sericifer	yes	KP017431	KM888771
Cereus hankeanus	yes	KP017435	KM888775
Cereus hexagonous	yes	KP017429	KM888776
Cereus hildmannianus	yes	KP017425	KM888772
Cereus insularis	yes	KP017432	KM888777
Cereus jamacaru calcirupicola	yes	KP017420	KM888760
Cereus jamacaru goiasensis	yes	KP017421	KM888769
Cereus jamacaru jamacaru	yes	-	KM888766
Cereus kroenleinii	yes	KP017446	-
Cereus mirabella	yes	KP017444	KM888764
Cereus mortensenii	yes	KP017433	-
Cereus pierre-braunianus	yes	KP017423	KM888768
Cereus repandus	yes	KP017427	-
Cereus saddianus	yes	KP017445	KM888773
Cereus spegazzinii	yes	KP017436	-
Cipocereus bradei	no	KP017437	-
Cipocereus crassisepalus	no	KP017438	-
Cipocereus minensis	no	KP017440	KM888774
Haageocereus pseudomelanostele	no	JQ779456	-
Maihuenia patagonica	no	-	AY875303
Matucana intertexta	no	JQ779458	-
Micranthocereus flaviflorus	no	JQ779524	-
Oreocereus celsianus	no	JQ779464	-
Parodia maassii	no	-	HQ621111
Pereskia aculeata	no	-	AY875312
Pilosocereus arrabidae	no	KP017418	KM888779
Praecereus euchlorus	no	KP017447	-
Praecereus saxicola	no	KP017448	-
Quiabentia verticulata	no	-	HQ621131
Rauhocereus riosaniensis	no	JQ779455	-
Samaipaticereus corroanus	no	JQ779498	-
Stetsonia coryne	no	JQ779508	-
Tephrocactus lurpinii	no	-	HQ621146

## Sheet: Cnidoscolus
species	BioGeoBEARS?	ITS	trnL-trnF	psbA-trnH
Cnidoscolus aconitifolius subsp. aconitifolius	yes	MH978978	MH935342	MH935228
Cnidoscolus aconitifolius subsp. polyanthus	yes	-	MH935329	-
Cnidoscolus acrandrus	yes	MH978985	MH935338	MH935264
Cnidoscolus adenochlamys	yes	MH978913	-	-
Cnidoscolus albidus	yes	MH978972	MH935325	MH935256
Cnidoscolus albomaculatus	yes	MH978920	MH935275	MH935219
Cnidoscolus angustidens subsp. angustidens	yes	MH978959	-	-
Cnidoscolus angustidens subsp. dentatus	yes	MH978936	MH935289	-
Cnidoscolus angustidens subsp. orbiculatus	yes	MH978928	MH935281	MH935225
Cnidoscolus bahianus	yes	-	MH935268	-
Cnidoscolus beckii	yes	MH978956	MH935309	MH935220
Cnidoscolus cajamarcensis	yes	MH978955	MH935308	-
Cnidoscolus cnicodendron	yes	MH978958	MH935312	MH935245
Cnidoscolus egregius	yes	MH978918	MH935272	MH935217
Cnidoscolus elasticus	yes	MH978969	MH935322	MH935253
Cnidoscolus hamosus	yes	MH978944	MH935297	-
Cnidoscolus hasslerianus	yes	MH978987	MH935339	MH935265
Cnidoscolus liebmannii	yes	MH978912	MH935267	MH935212
Cnidoscolus maculatus	yes	MH978962	MH935315	MH935247
Cnidoscolus maracayensis	yes	MH978957	MH935310	MH935243
Cnidoscolus megacanthus	yes	MH978932	MH935285	MH935229
Cnidoscolus monicanus	yes	MH978966	MH935319	MH935251
Cnidoscolus multilobus subsp. multilobus	yes	MH978922	MH935276	MH935221
Cnidoscolusmultilobus subsp. cylindratus	yes	MH978937	MH935290	MH935232
Cnidoscolus multilobus subsp. elasticoides	yes	MH978970	MH935323	MH935254
Cnidoscolus multilobus subsp. nov.	yes	MH978915	MH935270	MH935214
Cnidoscolus eglandulatus	yes	MH978982	MH935336	-
Cnidoscolus infiernidialis	yes	MH978914	MH935269	MH935213
Cnidoscolus obtusifolius	yes	MH978988	MH935340	MH935266
Cnidoscolus oligandrus	yes	MH978942	MH935295	MH935235
Cnidoscolus palmeri	yes	MH978974	MH935327	MH935258
Cnidoscolus populifolius	yes	MH978953	MH935306	-
Cnidoscolus quercifolius	yes	MH978945	MH935298	MH935236
Cnidoscolus rostratus subsp. rostratus	yes	MH978929	MH935282	MH935226
Cnidoscolus rostratus glabratus	yes	MH978935	MH935288	MH935231
Cnidoscolus rotundifolius	yes	MH978973	MH935326	MH935257
Cnidoscolus shrevei	yes	MH978971	MH935324	MH935255
Cnidoscolus sinaloensis	yes	MH978968	MH935321	MH935252
Cnidoscolus souzae	yes	MH978984	MH935337	MH935263
Cnidoscolus sp. 1	yes	MH978950	MH935302	MH935240
Cnidoscolus sp. 2	yes	-	MH935278	-
Cnidoscolus spinosus	yes	MH978964	MH935317	MH935249
Cnidoscolus stimulosus	yes	-	AY794679	-
Cnidoscolus tehuacanensis	yes	MH978923	MH935277	MH935222
Cnidoscolus tenuifolius	yes	MH978952	MH935305	MH935242
Cnidoscolus tepiquensis	yes	MH978965	MH935318	MH935250
Cnidoscolus tubulosus	yes	MH978933	MH935286	MH935230
Cnidoscolus ulei	yes	MH978946	MH935299	MH935237
Cnidoscolus urens	yes	MH978947	MH935300	MH935238
Cnidoscolus urniger	yes	MH978948	MH935301	MH935239
Cnidoscolus vitifolius	yes	MH978919	MH935274	MH935218
Jatropha gossypiifolia	no	MH978990	MH935343	-
Manihot aesculifolia	no	-	MH935341	-
Manihot caudata	no	-	KP691991	KP692094.1
Manihot chlorosticta	no	MH978989	-	-
Manihot esculenta	no	JQ743203.1	-	-
Manihot grahamii	no	-	AY794680	-
Manihot mcvaughii	no	-	KP691996	KP692099.1
Manihot oaxacana	no	-	KP691998	KP692101.1
Manihot websteri	no	-	KP692007	KP692110.1

## Sheet: Coursetia
species	BioGeoBEARS?	ITS
Coursetia andina	yes	AF398848
Coursetia axillaris	yes	AF398840
Coursetia brachyrhachis	yes	AF398837
Coursetia caatingicola	yes	HQ158097
Coursetia cajamarcana	yes	AF547187
Coursetia caribea var. caribea	yes	GQ996236
Coursetia caribea var. chiapensis	yes	AF542467
Coursetia caribea var. glandulosa	yes	GQ996220
Coursetia caribea var. ochroleuca	yes	AF398847
Coursetia caribea var. pacifica	yes	GQ996224
Coursetia caribea var. sericea	yes	GQ996226
Coursetia caribea var. tomentosa	yes	GQ996225
Coursetia caribea var. trifoliata	yes	AF542463
Coursetia chiapensis	yes	AF398830
Coursetia elliptica	yes	AF398828
Coursetia ferruginea	yes	AF398836
Coursetia fruticosa	yes	AF398838
Coursetia glabella	yes	AF398845
Coursetia glandulosa	yes	AF398839
Coursetia greenmanii	yes	GQ996238
Coursetia guatemalensis	yes	GQ996252
Coursetia hassleri	yes	AF398850
Coursetia hidalgoana	yes	AF398844
Coursetia hintonii	yes	AF398855
Coursetia insomniifolia	yes	AF398841
Coursetia madrensis	yes	AF398831
Coursetia maraniona	yes	AF398857
Coursetia mollis	yes	AF398856
Coursetia oaxacensis	yes	AF398829
Coursetia paniculata	yes	AF398833
Coursetia planipetiolata	yes	AF398832
Coursetia polyphylla	yes	AF398859
Coursetia pumilla	yes	AF398843
Coursetia rostrata	yes	HQ158070
Coursetia vicioides	yes	AF398849
Genistidium dumosum	no	AF537357
Olneya tesota	no	AF537355
Peteria glandulosa	no	AF537353
Peteria scoparia	no	AF398825
Peteria thompsoniae	no	AF398824
Poissonia heterantha	no	AF398842
Poissonia hypoleuca	no	AF542485
Poissonia orbicularis	no	AF398835
Poissonia weberbaueri	no	AF398852
Robinia hispida	no	AF398819
Robinia neomexicana	no	AF398818
Robinia pseudoacacia	no	AF398820
Robinia viscosa	no	AF398821
Sphinctospermum constrictum	no	AF537358

## Sheet: Cryptanthoids
species	BioGeoBEARS?	agt1	ETS	matK	phyC	trnH-psbA	ycf1_1	ycf1_6
Bromelia pinguin	no	-	-	EU681899	JX649422	KJ676896	-	-
Bromelia serra	no	-	-	AY950019	JX649423	KJ676897	-	-
Cryptanthus acaulis	yes	MF169279	MF169216	-	MF169362	-	MF169412	MF169466
Cryptanthus bahianus	yes	-	-	AY950011	JX649431	KJ676898	-	-
Cryptanthus beuckeri	yes	MF169278	MF169219	AF539965	MF169371	HQ913672	MF169422	MF169476
Cryptanthus bromelioides	yes	-	-	MF169311	MF169361	KJ580216	-	-
Cryptanthus burle-marxii	yes	MF169282	MF169220	-	-	-	MF169419	MF169473
Cryptanthus colnagoi	yes	MF169277	MF169218	MF169308	MF169340	KJ676899	MF169393	MF169445
Cryptanthus diamantinensis	yes	MF169280	MF169222	MF169309	MF169338	KJ676900	MF169391	MF169443
Cryptanthus dianae	yes	MF169283	MF169221	-	MF169365	-	MF169415	MF169469
Cryptanthus dorothyae	yes	-	-	KJ580072-FJ968168	FJ968238	KJ580218	-	-
Cryptanthus maritimus	yes	MF169281	MF169217	MF169310	MF169345	-	MF169398	MF169450
Cryptanthus ruthae	yes	MF169276	MF169223	MF169312	MF169353	-	MF169405	MF169458
Cryptanthus teretifolius	yes	MF169215	MF169307	MF169335	-	-	-	-
Cryptanthus warren-loosei	yes	-	-	JX649255	JX649436	KJ676902	-	-
Cryptanthus zonatus	yes	-	-	-	KJ716288	KJ676903	-	-
Forzzaea leopoldo-horstii	yes	MF169292	MF169240	-	MF169373	-	MF169424	MF169478
Forzzaea sp. nov.	yes	MF169306	MF169255	MF169334	MF169389	-	MF169441	MF169495
Forzzaea warasii	yes	-	MF169256	MF169333	MF169388	-	MF169440	MF169494
Hoplocryptanthus caracensis	yes	MF169284	MF169230	MF169322	MF169350	-	MF169402	MF169455
Hoplocryptanthus ferrarius	yes	MF169291	MF169234	-	MF169369	-	MF169420	MF169474
Hoplocryptanthus glaziovii	yes	MF169290	MF169229	MF169321	MF169358	-	MF169410	MF169463
Hoplocryptanthus lavrasensis	yes	MF169285	MF169231	-	MF169372	-	MF169423	MF169477
Hoplocryptanthus regius	yes	MF169288	MF169227	MF169319	MF169346	-	MF169399	MF169451
Hoplocryptanthus schwackeanus	yes	MF169287	MF169233	MF169323	MF169357	-	MF169409	MF169462
Hoplocryptanthus tiradentesensis	yes	MF169289	MF169228	-	MF169368	KJ666539	MF169418	MF169472
Hoplocryptanthus vidaliorum	yes	MF169286	MF169232	MF169320	MF169356	-	MF169408	MF169461
Lapanthus duartei	yes	MF169293	-	MF169313	MF169343	KJ666540	MF169396	MF169448
Lapanthus itambensis	yes	MF169294	-	MF169314	MF169344	-	MF169397	MF169449
Ochagavia littoralis	no	-	-	-	KJ716329	KJ676904	-	-
Orthophytum alvimii	yes	-	-	-	KJ716291	KJ666542	-	-
Orthophytum argentum	yes	-	-	-	KJ716293	KJ666544	-	-
Orthophytum benzingii	yes	MF169260	MF169242	-	MF169375	-	MF169426	MF169480
Orthophytum boudetianum	yes	-	-	-	KJ716295	KJ666546	-	-
Orthophytum braunii	yes	-	-	-	KJ716296	KJ666547	-	-
Orthophytum compactum	yes	MF169272	-	JX649266	MF169376	-	MF169427	MF169481
Orthophytum conquistense	yes	-	-	-	KJ716298	KJ666549	-	-
Orthophytum diamantinense	yes	MF169273	MF169245	MF169317	MF169337	KJ666575	MF169390	MF169442
Orthophytum disjunctum	yes	MF169258	MF169254	MF169325	MF169354	-	MF169406	MF169459
Orthophytum duartei	yes	MF169266	MF169251	-	MF169380	-	MF169431	MF169485
Orthophytum estevesii	yes	-	-	-	KJ716299	KJ666550	-	-
Orthophytum falconii	yes	-	-	-	KJ716300	KJ666551	-	-
Orthophytum foliosum	yes	MF169267	-	-	MF169379	KJ666552	MF169430	MF169484
Orthophytum fosterianum	yes	MF169259	MF169243	KJ580102	MF169378	KJ666553	MF169429	MF169483
Orthophytum glabrum	yes	-	MF169241	MF169318	MF169348	KJ666554	MF169401	MF169453
Orthophytum graomogolense	yes	-	-	-	KJ716304	KJ666555	-	-
Orthophytum grossiorum	yes	-	-	-	KJ716305	KJ666556	-	-
Orthophytum gurkenii	yes	-	-	FJ968209	KJ716306	KJ666557	-	-
Orthophytum harleyi	yes	-	-	JX649268	KJ716307	KJ666558	-	-
Orthophytum horridum	yes	-	-	-	KJ716310	KJ666561	-	-
Orthophytum lanuginosum	yes	-	-	-	KJ716312	KJ666563	-	-
Orthophytum lemei	yes	-	-	-	KJ716313	KJ666564	-	-
Orthophytum leprosum	yes	-	-	-	MF169381	-	MF169432	MF169486
Orthophytum lucidum	yes	MF169261	-	-	MF169374	-	MF169425	MF169479
Orthophytum macroflorum	yes	-	-	-	KJ716315	KJ666566	-	-
Orthophytum magalhaesii	yes	-	-	-	KJ716316	KJ666567	-	-
Orthophytum mello-barretoi	yes	MF169274	MF169246	-	MF169382	KJ666568	MF169433	MF169487
Orthophytum pseudostoloniferum	yes	-	-	-	KJ722610	KJ666571	-	-
Orthophytum pseudovagans	yes	MF169270	-	-	MF169383	-	MF169434	MF169488
Orthophytum riocontense	yes	-	-	-	KJ716320	KJ716320	-	-
Orthophytum roseolilacinum	yes	MF169265	-	-	MF169385	-	MF169437	MF169491
Orthophytum rubiginosum	yes	MF169271	-	-	MF169377	-	MF169428	MF169482
Orthophytum santaritense	yes	MF169262	-	-	MF169387	-	MF169439	MF169493
Orthophytum saxicola	yes	MF169257	MF169253	MF169324	MF169351	-	MF169403	MF169456
Orthophytum schulzianum	yes	MF169275	MF169244	-	MF169384	-	MF169435	MF169489
Orthophytum sucrei	yes	-	-	-	KJ716324	KJ666577	-	-
Orthophytum toscanoi	yes	-	-	-	KJ716325	KJ666578	-	-
Orthophytum vagans	yes	MF169269	MF169247	MF169330	MF169339	KJ666580	MF169392	MF169444
Orthophytum vasconcelosianum	yes	MF169263	-	MF169326	MF169386	-	MF169436	MF169490
Orthophytum zanonii	yes	MF169268	MF169248	MF169331	MF169352	KJ666581	MF169404	MF169457
Puya chilensis	no	-	-	-	KJ716330	KJ666582	-	-
Rokautskyia exaltata	yes	MF169298	MF169250	-	MF169363	-	MF169413	MF169467
Rokautskyia fernseeoides	yes	MF169300	MF169252	-	MF169364	-	MF169414	MF169468
Rokautskyia latifolia	yes	MF169302	MF169238	-	MF169367	-	MF169417	MF169471
Rokautskyia microglazioui	yes	MF169297	MF169249	MF169329	MF169347	KJ666538	MF169400	MF169452
Rokautskyia odoratissima	yes	MF169301	MF169235	MF169332	MF169359	KJ676901	MF169411	MF169464
Rokautskyia pseudoscaposa	yes	MF169305	MF169239	-	MF169366	-	MF169416	MF169470
Rokautskyia roberto-kautskyi	yes	MF169304	-	MF169328	MF169342	-	MF169395	MF169447
Rokautskyia sanctaluciae	yes	MF169299	MF169236	-	MF169370	-	MF169421	MF169475
Rokautskyia scaposa	yes	MF169303	MF169237	MF169327	MF169341	-	MF169394	MF169446
Sincoraea albopicta	yes	-	-	JX649265	JX649465	-	-	-
Sincoraea burle-marxii	yes	MF169295	MF169225	MF169315	MF169349	KJ666548	-	MF169454
Sincoraea hatschbachii	yes	-	-	-	KJ716308	KJ666559	-	-
Sincoraea heleniceae	yes	MF169296	MF169226	MF169316	MF169355	-	MF169407	MF169460
Sincoraea humilis	yes	-	-	KJ580104	KJ716311	KJ666562	-	-
Sincoraea mucugensis	yes	-	-	-	KJ716318	KJ666569	-	-
Sincoraea navioides	yes	-	-	KJ580105	-	KJ580251	-	-
Sincoraea ophiuroides	yes	-	-	-	KJ722611	KJ666570	-	-
Sincoraea ulei	yes	-	MF169224	JX649270	MF169336	KJ666579	-	-

## Sheet: Ficus
species	BioGeoBEARS?	At103	ETS	G3pdh	ITS	Tpi
Antiaropsis decipiens	no	KJ417793	EU084403	EF092326	AY730142	-
Castilla elastica	no	KJ417672	AY730232	EF092327	FJ916997	-
Ficus adhatodifolia	no	KY824106	KY888949	KY888986	KY889036	KY889005
Ficus albert-smithii	yes	-	AY730157	EU087635	AY730069	-
Ficus amazonica	yes	KY824105	-	-	-	KY889010
Ficus americana	yes	-	AY730158	EF092339	AY730070	-
Ficus andicola	yes	-	AY730159	EF092340	AY730071	-
Ficus arpazusa	yes	-	KY888953	-	KY889039	-
Ficus aurea	yes	-	EU084431	EU087636	EU091598	-
Ficus auriculata	no	-	FJ812281	EU087653	KM234117	-
Ficus bahiensis	yes	-	KY888954	-	KY889040	-
Ficus benjamina	no	-	AY063520	EF092333	AY063559	-
Ficus bonijesulapensis	yes	-	-	-	KY889052	KY889006
Ficus brachypoda	yes	-	-	EF538788	EF545652	-
Ficus broadwayi	yes	-	AY730160	EF092341	AY730072	-
Ficus bullenei	yes	-	-	EU089833	EU081758	-
Ficus caatingae	yes	KY824104	KY888966	-	KY889041	KY889030
Ficus caballina	yes	-	AY730161	-	AY730073	-
Ficus calimana	yes	-	AY730162	-	AY730074	-
Ficus calyptroceras	yes	KY824103	-	KY888989	KY889050	KY889032
Ficus carautana	yes	KY824102	KY888957	KY888990	KY889044	KY889022
Ficus casapiensis	yes	-	AY730163	-	AY730075	-
Ficus castellviana	yes	-	KY888982	-	KY889053	KY889021
Ficus cestrifolia	yes	KY824099	KY888955	KY888991	KY889057	KY889024
Ficus citrifolia	yes	KY824096	AY730165	AY967955	AY730077	KY889015
Ficus clusiifolia	yes	KY824095	KY888976	KY888995	KY889061	KY889035
Ficus coerulescens	yes	-	EU084434	EU087638	EU091601	-
Ficus costaricana	yes	-	EU084435	AY967952	EU091602	-
Ficus craterostoma	yes	-	AY730186	EF092349	GQ504308	-
Ficus crocata	yes	KY824094	KY888960	KY888996	KY889048	KY889012
Ficus cyclophylla	yes	KY824092	KY888979	-	KY889064	KY889014
Ficus dugandii	yes	-	-	AY967957	EU081763	-
Ficus elasticoides	yes	-	AY730192	EF092354	AY730103	-
Ficus enormis	yes	-	KY888970	-	KY889045	-
Ficus enormis	yes	-	-	-	KY889045	-
Ficus eugeniifolia	yes	-	AY730166	-	AY730078	-
Ficus eximia	yes	KY824091	KY888959	EF092344	KY889046	KY889031
Ficus glabrata	no	-	AY063550	AY967960	AY063593	-
Ficus glandifera	yes	-	AY730202	EF092361	AY730113	-
Ficus goiana	yes	KY824089	KY888972	-	KY889058	KY889034
Ficus gomelleira	yes	KY824088	KY888962	KY889001	KY889049	KY889026
Ficus guaranitica	yes	-	KY888983	-	-	-
Ficus guianensis	yes	KY824087	KY888980	-	KY889060	KY889016
Ficus hirsuta	yes	KY824086	KY888965	KY889002	-	-
Ficus holosericea	yes	KY824085	KY888968	KY888998	KY889065	KY889027
Ficus insipida	no	-	AY063549	AY967961	AY063592	-
Ficus krukovii	yes	-	EU084436	-	EU091603	-
Ficus lagoensis	yes	KY824083	KY888967	-	KY889042	-
Ficus lapathifolia	no	-	EU084405	EU087609	EU091564	-
Ficus laureola	yes	KY824082	KY888956	-	KY889056	KY889025
Ficus longifolia	yes	-	-	-	EU091604	-
Ficus luschnathiana	yes	KY824081	KY888981	EF092345	KY889059	KY889023
Ficus mariae	yes	KY824080	KY888974	KY888992	-	-
Ficus mathewsii	yes	KY824079	KY888977	-	KY889062	-
Ficus maxima	no	-	-	AY967958	AY063595	-
Ficus mexiae	yes	KY824078	KY888975	KY889000	KY889043	KY889018
Ficus mucuso	no	-	AY730210	EF092372	AY730120	-
Ficus nevesiae	no	KY824077	KY888952	KY888987	KY889037	KY889007
Ficus nymphaeifolia	yes	-	AY063527	EU089843	AY063566	-
Ficus obtusifolia	yes	KY824076	AY730172	AY967949	AY730084	KY889019
Ficus obtusiuscula	no	KY824075	KY888950	KY888988	KY889038	KY889009
Ficus pakkensis	yes	KY824074	-	-	-	-
Ficus palmeri	yes	-	AY730173	-	AY730085	-
Ficus paraensis	yes	-	AY730174	AY967954	AY730086	-
Ficus perforata	yes	-	AY730175	AY967951	AY730087	-
Ficus pertusa	yes	KY824073	KY888985	KY889003	-	KY889029
Ficus petiolaris	yes	-	AY730177	-	AY730088	-
Ficus piresiana	no	-	-	EU087610	KP406969	-
Ficus platypoda	yes	-	AY730206	EF538794	AY730116	-
Ficus popenoei	yes	-	-	EU089842	EU081761	-
Ficus pulchella	no	KY824072	KY888951	KY888997	-	KY889008
Ficus roraimensis	yes	KY824070	KY888973	KY888997	KY889051	KY889011
Ficus scassellatii	yes	-	AY730196	EF092357	AY730107	-
Ficus schippii	yes	-	AY730178	-	AY730089	-
Ficus schumacheri	yes	-	-	EF092346	AY063567	-
Ficus sp.	yes	-	EU084432	EU087637	EU091599	-
Ficus spathulifolia	no	-	EU084428	EU087631	EU091594	-
Ficus sphenophylla	yes	-	-	-	EU091605	-
Ficus stricta	no	-	EU084429	EU087632	EU091595	-
Ficus subandina	yes	-	DQ455687	EU087639	DQ455668	-
Ficus tequendamae	yes	-	EU084437	-	EU091606	-
Ficus tikoua	no	-	EU084468	EU087673	EU091641	-
Ficus tonduzii	no	-	AY063552	AY967959	AY063594	-
Ficus trigona	yes	KY824069	DQ455688	-	DQ455669	-
Ficus trigonata	yes	-	-	AY967956	EU091607	-
Ficus triradiata	yes	-	AY730207	EF092364	AY730117	-
Ficus tuerckheimii	yes	-	EU084438	EU087640	EU091608	-
Ficus turbinata	yes	-	-	EU089832	EU081769	-
Sparattosyce dioica	no	KJ417734	AY730231	EU087607	AY730141	-

## Sheet: Harrisia
species	BioGeoBEARS?	isi1	nhx1	atpB-rbcL	rpl16
Arthrocereus spinosissimus	no	JN166832	JN166858	JN166897	JN166920
Cleistocactus laniceps	no	JN166828	-	JN166877	JN166916
Echinopsis atacamensis subsp. pasacana	no	JN166819	JN166860	JN166881	JN166903
Echinopsis aurea	no	JN166833	JN166862	JN166878	JN166925
Echinopsis bridgesii subsp. yungasensis	no	JN166814	JN166857	JN166865	JN166918
Echinopsis camarguensis	no	JN166820	JN166847	JN166890	JN166912
Echinopsis candicans	no	JN166826	JN166850	JN166885	JN166907
Echinopsis chaemacereus	no	-	-	JN166883	JN166924
Echinopsis chiloensis subsp. litoralis	no	JN166830	JN166846	JN166882	JN166905
Echinopsis formosa	no	-	-	JN166884	JN166922
Echinopsis haematantha	no	JN166834	JN166863	JN166879	JN166927
Echinopsis hahniana	no	JN166817	JN166849	JN166888	JN166908
Echinopsis lageniformis	no	JN166823	JN166852	JN166894	JN166915
Echinopsis pachanoi	no	JN166821	JN166853	JN166895	JN166917
Echinopsis schickendantzii	no	JN166831	JN166854	JN166889	JN166909
Echinopsis strigosa	no	JN166822	JN166845	JN166892	JN166911
Echinopsis tacaquirensis	no	JN166829	JN166851	JN166893	JN166914
Echinopsis terscheckii	no	JN166818	JN166844	JN166880	JN166904
Echinopsis thelegona	no	JN166816	JN166859	JN166887	JN166910
Echinopsis vasquezii	no	JN166825	JN166861	JN166891	JN166913
Haageocereus decumbens	no	JQ889315	JQ889321	JQ889304	JQ889310
Haageocereus pseudomelanostele	no	JQ889316	-	JQ889305	JQ889308
Harrisia adscendens	yes	JN166835	JN166840	JN166871	JN166899
Harrisia bonplandii	yes	-	-	JN166870	JN166926
Harrisia brookii	yes	JN166812	JN166837	JN166874	JN166928
Harrisia earlei	yes	JN166810	JN166839	JN166872	JN166932
Harrisia earlei	yes	JQ889319	JQ889325	JQ889306	JQ889313
Harrisia fernowii	yes	JN166809	JN166864	JN166875	JN166929
Harrisia fragrans	yes	JN166811	JN166836	JN166876	JN166930
Harrisia gracilis	yes	JQ889318	JQ889324	JQ889307	JQ889314
Harrisia pomanensis	yes	-	-	JN166869	JN166923
Harrisia regelii	yes	JN166807	JN166842	JN166867	JN166902
Harrisia simpsonii	yes	JN166808	JN166838	JN166873	JN166931
Harrisia tetracantha	yes	JN166813	JN166843	JN166866	JN166900
Harrisia tortuosa	yes	JN166806	JN166841	JN166868	JN166901
Monvillea cavendishii	no	JN166823	JN166856	JN166896	JN166921
Pilosocereus pachycladus	no	JQ889317	JQ889320	JQ889303	JQ889309
Rhipsalis pilocarpa	no	-	JQ889323	-	JQ889312
Samaipaticereus corroanus	no	JN166815	JN166848	JN166886	JN166906
Selenicereus pteranthus	no	-	JQ889322	JQ889302	JQ889311
Yungasocereus inquisivensis	no	JN166827	JN166855	JN166898	JN166919

[truncated: 9 more sheets: Leuenbegeria, Manihot, Marsdenia, Martyniaceae, Mimosa, Pereskia, Piptadenia, Pterocarpus, Vataireoids]
