# Supplementary material for: The Origins and Historical Assembly of the Brazilian Caatinga Seasonally Dry Tropical Forests
Source: Frontiers journal article supplement (doi:10.3389/fevo.2022.723286), 2022-02-24
Supplement: Table_3.XLSX [file Table_3.XLSX]

## Sheet: S3_callibrations
lineage	type of callibration	group	age	references
Amorimia	Secondary	Stigmaphylloid clade crown node	44 ± 1	Cai et al., 2016
Amorimia	Secondary	Malpighioid clade crown node	35 ± 5	Cai et al., 2016
Bombacoids	Primary	Bombacoideae crown node	56.0 ± 0.6	Germeraad et al., 1968
Bombacoids	Primary	Eriotheca stem node	33.9 ± 1.5	Lima and Salard-Cheboldaeff, 1981
Brongniartieae	Primary	Bowdichia crown node	45 ± 1	Herendeen and Dilcher, 2019
Caesalpinia	Primary	Caesalpinia group crown node	54.78 ± 1.5	Gagnón et al., 2019
Calliandra	Secondary	Ingeae + Acacia s.str. crown node	23.9 ± 3.1	Lavin et al., 2005
Calliandra	Primary	Calliandra crown node	16 ± 1	Caccavari and Barreda, 2000
Cereus	Secondary	BTC cronw node	6.57 ± 1.4	Hernández-Hernández et al., 2014
Cnidoscolus	Secondary	Cnidoscolus crown node	4.2 ± 0.5	Smith and Brown, 2018
Coursetia	Primary	Robinioid legumes crown node	34 ± 1	Lavin et al., 2005
Cryptanthoids	Secondary	Puyoideae + Bromelioideae crown node	10.1 ± 0.5	Gvinish et al., 2011
Ficus sect. Americanae	Secondary	sect Americanae crown node	25.9 ± 3.6	Machado et al., 2018
Harrisia	Secondary	Trichocereinae cown node	6.12 ± 0.5	Arakaki et al., 2011
Holoregmia	Secondary	Martyniaceae stem node	22.76 ± 2	Magallón et al., 2015
Leuenbegeria	Secondary	Cactaceae crown node	26.88 ± 3.1	Hernández-Hernández et al., 2014
Manihot	Secondary	Manihot crown node	6.2 ± 0.8	Smith and Brown, 2018
Mimosa	Secondary	Mimosa crown node	24.0 ± 3.5	Simon et al., 2009
Pereskia	Secondary	Cactaceae crown node	26.88 ± 3.1	Hernández-Hernández et al., 2014
Piptadenia	Primary	Ingae/Acaciae stem node	45 ± 1	Simon et al., 2009
Pterocarpus	Secondary	Pterocarpus stem node	20.3 ± 3.6	Lavin et al., 2005
Marsdenia	Secondary	American Marsdenia crown node	22.8 ± 3.1	Fishbein et al., 2018
Vataireoids	Secondary	Vataireoids cown node	18.4 ± 2.5	Lavin et al., 2005
