# Supplementary material for: The Origins and Historical Assembly of the Brazilian Caatinga Seasonally Dry Tropical Forests
Source: Frontiers journal article supplement (doi:10.3389/fevo.2022.723286), 2022-02-24
Supplement: Table_4.XLSX [file Table_4.XLSX]

## Sheet: S4_biogeographic_events
Lineage	Type	Event	Area	MeanAge	MinAge	MaxAge
Amorimia	Cladogenetic	Shifts into the Caatinga	Atlantic Forest	11.9237	8.1088	16.1545
Amorimia	Cladogenetic	In situ speciation	Caatinga	5.5486	3.6017	7.8929
Amorimia	Cladogenetic	Shifts from the Caatinga	Atlantic Forest	4.6825	2.8446	6.7448
Amorimia	Cladogenetic	Shifts from the Caatinga	Cerrado + Pampas	2.9094	1.163	5.2338
Amorimia	Cladogenetic	Shifts from the Caatinga	Andes	9.5792	6.2436	13.3958
Amorimia	Cladogenetic	Shifts into the Caatinga	Atlantic Forest	16.4032	11.44	22.2027
Bombacoids	Anagenetic	Shifts into the Caatinga	Atlantic Forest	11.7624	5.4534	19.22
Bombacoids	Cladogenetic	In situ speciation	Caatinga	2.1477	0.2445	2.18
Bombacoids	Cladogenetic	Shifts from the Caatinga	Atlantic Forest	0.9906	0.8117	4.2427
Bombacoids	Cladogenetic	Shifts into the Caatinga	Amazon	41.9263	36.8901	48.0711
Bombacoids	Cladogenetic	Shifts from the Caatinga	Atlantic Forest	20.1898	12.7276	28.2441
Bombacoids	Anagenetic	Shifts into the Caatinga	Cerrado + Pampas	2.0549	1.0214	3.2455
Bombacoids	Anagenetic	Shifts into the Caatinga	Atlantic Forest	1.435	0.3997	2.5939
Bombacoids	Cladogenetic	Shifts into the Caatinga	Atlantic Forest	1.0378	0.3238	2.0276
Bombacoids	Cladogenetic	In situ speciation	Caatinga	0.7758	0.1098	1828
Bombacoids	Cladogenetic	Shifts into the Caatinga	Cerrado + Pampas	5.3777	3.3502	7.732
Bombacoids	Cladogenetic	In situ speciation	Caatinga	1.4743	0.5967	2.7321
Bombacoids	Cladogenetic	In situ speciation	Caatinga	1.1033	0.2823	2.2131
Brongniartieae	Cladogenetic	Shifts into the Caatinga	Amazon	22.7557	15.7169	29.806
Brongniartieae	Anagenetic	Shifts into the Caatinga	Atlantic Forest	8.4046	5.2109	12.4189
Brongniartieae	Anagenetic	Shifts into the Caatinga	Atlantic Forest	4.3301	1.9698	7.3545
Calliandra	Cladogenetic	Shifts into the Caatinga	North America	6.5011	4.2526	9.0595
Calliandra	Cladogenetic	In situ speciation	Caatinga	5.0133	2.9767	7.2001
Calliandra	Cladogenetic	In situ speciation	Caatinga	3.1761	1.5056	5.2713
Calliandra	Cladogenetic	Shifts from the Caatinga	Cerrado + Pampas	3.1624	1.3746	5.3045
Calliandra	Cladogenetic	Shifts into the Caatinga	North America	7.5438	5.5152	9.7227
Calliandra	Cladogenetic	In situ speciation	Caatinga	5.9784	4.2572	7.9502
Calliandra	Cladogenetic	In situ speciation	Caatinga	2.2114	0.7695	4.2948
Calliandra	Cladogenetic	In situ speciation	Caatinga	5.2393	3.5881	6.9032
Calliandra	Anagenetic	Shifts into the Caatinga	Cerrado + Pampas	2.5734	1.3933	3.8959
Calliandra	Cladogenetic	Shifts from the Caatinga	Cerrado + Pampas	4.1659	2.5447	5.749
Calliandra	Cladogenetic	In situ speciation	Caatinga	2.2885	0.9724	3.6015
Calliandra	Cladogenetic	In situ speciation	Caatinga	1.2029	0.412	2.3109
Cereus	Cladogenetic	In situ speciation	Caatinga	0.1425	0.006	0.4673
Cereus	Cladogenetic	Shifts into the Caatinga	Cerrado + Pampas	0.9904	0.3306	1.9537
Cereus	Cladogenetic	Shifts into the Caatinga	Cerrado + Pampas	0.9079	0.3624	1.6618
Cereus	Cladogenetic	Vicariance	Cerrado + Pampas	0.4201	0.121	0.9304
Cereus	Cladogenetic	Shifts into the Caatinga	Cerrado + Pampas	0.2793	0.067	0.6055
Cereus	Cladogenetic	In situ speciation	Cerrado + Pampas	0.1259	0.011	0.3431
Coursetia	Cladogenetic	Shifts into the Caatinga	North America	12.2501	8.2659	16.4628
Coursetia	Cladogenetic	In situ speciation	Caatinga	7.003	3.792	11.0642
Coursetia	Cladogenetic	In situ speciation	Caatinga	5.2301	2.3898	8.4979
Harrisia	Cladogenetic	Vicariance	Chaco	2.5432	1.1352	4.4675
Harrisia	Cladogenetic	Shifts from the Caatinga	Caribbean Islands	1.2683	0.4491	2.5259
Leuenbegeria	Cladogenetic	Shifts into the Caatinga	Northern South America	10.2161	4.4075	17.7581
Martyniaceae	Cladogenetic	Shifts into the Caatinga	Cerrado + Pampas	5.3839	2.9203	8.4507
Pereskia	Cladogenetic	Shifts into the Caatinga	Atlantic Forest	4.1132	1.4491	7.594
Pereskia	Cladogenetic	In situ speciation	Caatinga	1.4762	0.01	4.1599
Piptadenia	Anagenetic	Shifts into the Caatinga	Cerrado + Pampas	21.1481	15.3265	27.2942
Piptadenia	Anagenetic	Shifts into the Caatinga	Cerrado + Pampas	15.4345	10.6032	20.7241
Piptadenia	Cladogenetic	Vicariance	Cerrado + Pampas	11.6663	6.8491	16.9795
Piptadenia	Cladogenetic	In situ speciation	Caatinga	5.4815	2.2759	9.7512
Piptadenia	Anagenetic	Shifts from the Caatinga	North America	5.4815	2.2759	9.7512
Pterocarpus	Cladogenetic	Vicariance	North America	8.8939	5.1454	13.5292
Pterocarpus	Cladogenetic	In situ speciation	Caatinga	5.6002	2.4561	9.4466
Pterocarpus	Cladogenetic	In situ speciation	Caatinga	2.6696	0.8575	5.1631
Pterocarpus	Cladogenetic	In situ speciation	Caatinga	1.7864	0.4453	3.933
Marsdenia	Cladogenetic	In situ speciation	Caatinga	1.1407	0.4415	2.1579
Marsdenia	Cladogenetic	In situ speciation	Caatinga	1.6446	0.7282	2.7995
Marsdenia	Cladogenetic	Shifts from the Caatinga	Cerrado + Pampas	2.1271	1.1409	3.3359
Marsdenia	Cladogenetic	In situ speciation	Caatinga	2.6375	1.4473	4.1019
Marsdenia	Cladogenetic	In situ speciation	Caatinga	1.3905	0.4674	2.5066
Marsdenia	Cladogenetic	In situ speciation	Caatinga	1.8028	0.7604	3.0628
Marsdenia	Cladogenetic	In situ speciation	Caatinga	3.5249	2.0908	5.1581
Marsdenia	Cladogenetic	Shifts from the Caatinga	Cerrado + Pampas	2.6246	1.4603	3.9391
Marsdenia	Cladogenetic	Shifts from the Caatinga	Cerrado + Pampas	1.7496	0.8069	3.0069
Marsdenia	Cladogenetic	Shifts into the Caatinga	Cerrado + Pampas	1.3618	0.4225	2.5586
Marsdenia	Cladogenetic	In situ speciation	Caatinga	4.9443	2.9092	7.512
Marsdenia	Anagenetic	Shifts from the Caatinga	Atlantic Forest	4.9443	2.9092	7.512
Marsdenia	Anagenetic	Shifts from the Caatinga	Cerrado + Pampas	4.9443	2.9092	7.512
Marsdenia	Cladogenetic	Shifts from the Caatinga	Atlantic Forest	9.2472	6.4133	12.1737
Marsdenia	Cladogenetic	Vicariance	Amazon	10.3478	7.4352	13.3962
Marsdenia	Cladogenetic	Vicariance	Caribbean Islands	10.3478	7.4352	13.3962
Marsdenia	Cladogenetic	Vicariance	North America	10.3478	7.4352	13.3962
Marsdenia	Cladogenetic	Shifts into the Caatinga	Atlantic Forest	7.7917	5.2261	10.6361
Marsdenia	Cladogenetic	In situ speciation	Caatinga	6.5235	4.0957	9.1508
Marsdenia	Cladogenetic	In situ speciation	Caatinga	3.9314	1.7572	6.4649
Marsdenia	Anagenetic	Shifts from the Caatinga	Amazon	3.9314	1.7572	6.4649
Marsdenia	Cladogenetic	Shifts from the Caatinga	Atlantic Forest	1.9764	0.7603	3.9019
Marsdenia	Cladogenetic	Shifts from the Caatinga	Amazon	4.0975	2.2234	6.1469
Marsdenia	Cladogenetic	Vicariance	Amazon	2.0307	0.6155	3.8484
Vataireoids	Cladogenetic	Shifts into the Caatinga	Atlantic Forest	2.7897	1.8929	3.8574
Vataireoids	Cladogenetic	In situ speciation	Caatinga	2.3486	1.673	3.2769
Vataireoids	Cladogenetic	In situ speciation	Caatinga	2.0801	1.432	2.9067
Vataireoids	Cladogenetic	In situ speciation	Caatinga	1.2305	0.7274	1.8758
Vataireoids	Cladogenetic	In situ speciation	Caatinga	0.4217	0.148	0.7837
Vataireoids	Cladogenetic	In situ speciation	Caatinga	0.3831	0.1291	0.7526
Vataireoids	Cladogenetic	Shifts from the Caatinga	Amazon	1.4021	0.9243	2.0314
Vataireoids	Cladogenetic	Shifts from the Caatinga	Cerrado + Pampas	1.1989	0.7397	1.7622
Vataireoids	Cladogenetic	Shifts from the Caatinga	Amazon	0.6574	0.2702	1.1547
Ficus	Cladogenetic	Vicariance	Atlantic Forest	25.5681	21.7451	29.4494
Ficus	Anagenetic	Shifts into the Caatinga	Atlantic Forest	7.3684	3.3663	12.2445
Ficus	Anagenetic	Shifts into the Caatinga	Atlantic Forest	3.849	0.7645	8.3619
Ficus	Cladogenetic	Shifts into the Caatinga	Atlantic Forest	0.5246	0.0002	2.6627
Ficus	Cladogenetic	Shifts into the Caatinga	Atlantic Forest	6.7575	3.4635	10.3645
Ficus	Anagenetic	Shifts into the Caatinga	Amazon	2.8103	0.883	5.3648
Ficus	Cladogenetic	Shifts into the Caatinga	Amazon	4.763	1.7347	8.307
Manihot	Cladogenetic	Shifts into the Caatinga	Cerrado + Pampas	1.6463	0.7302	2.8282
Manihot	Anagenetic	Shifts into the Caatinga	Cerrado + Pampas	1.4964	0.6805	2.4504
Manihot	Cladogenetic	Shifts into the Caatinga	Cerrado + Pampas	4.0464	2.4821	5.1265
Manihot	Cladogenetic	In situ speciation	Caatinga	3.42	2.0247	5.1285
Manihot	Cladogenetic	Shifts from the Caatinga	Atlantic Forest	2.8934	1.1814	4.6404
Manihot	Cladogenetic	Shifts from the Caatinga	Cerrado + Pampas	1.2071	0.4685	2.1333
Manihot	Cladogenetic	Shifts into the Caatinga	Cerrado + Pampas	1.9305	0.7176	3.5005
Manihot	Cladogenetic	Shifts into the Caatinga	Cerrado + Pampas	2.837	1.6467	4.1588
Manihot	Anagenetic	Shifts from the Caatinga	Chaco	2	1.0496	3.1677
Manihot	Anagenetic	Shifts from the Caatinga	Northern South America	2	1.0496	3.1677
Manihot	Cladogenetic	In situ speciation	Caatinga	2	1.0496	3.1677
Manihot	Cladogenetic	Shifts from the Caatinga	Amazon	1.366	0.5892	2.334
Manihot	Cladogenetic	In situ speciation	Caatinga	0.524	0.1603	1.0669
Manihot	Anagenetic	Shifts into the Caatinga	Cerrado + Pampas	1.8226	0.8538	3.1695
Caesalpinia s.l.	Cladogenetic	Shifts into the Caatinga	North America	28.6735	24.4228	32.3099
Caesalpinia s.l.	Anagenetic	Shifts into the Caatinga	Chaco	4.4853	2.0748	7.4513
Caesalpinia s.l.	Cladogenetic	In situ speciation	Caatinga	2.8259	1.2372	4.9189
Caesalpinia s.l.	Cladogenetic	In situ speciation	Caatinga	4.0883	2.311	6.2152
Caesalpinia s.l.	Cladogenetic	In situ speciation	Caatinga	5.1814	3.0524	7.5953
Caesalpinia s.l.	Cladogenetic	Vicariance	Cerrado + Pampas	7.7308	5.3429	10.4988
Caesalpinia s.l.	Cladogenetic	Shifts from the Caatinga	Cerrado + Pampas	6.8112	4.2441	9.506
Caesalpinia s.l.	Anagenetic	Shifts from the Caatinga	Atlantic Forest	6.8112	4.2441	9.506
Cryptanthoids	Cladogenetic	Shifts into the Caatinga	Atlantic Forest	3.4032	1.8728	5.1236
Cryptanthoids	Cladogenetic	In situ speciation	Caatinga	0.4535	0.0016	1.5177
Cryptanthoids	Anagenetic	Shifts into the Caatinga	Atlantic Forest	0.1493	0	0.7991
Cryptanthoids	Cladogenetic	Shifts into the Caatinga	Atlantic Forest	1.848	1.0157	2.8692
Cryptanthoids	Cladogenetic	Shifts from the Caatinga	Cerrado + Pampas	1.252	0.5163	2.0026
Cryptanthoids	Cladogenetic	In situ speciation	Caatinga	1.0096	0.3341	1.893
Cryptanthoids	Cladogenetic	In situ speciation	Caatinga	0.7061	0.0953	1.493
Cryptanthoids	Cladogenetic	In situ speciation	Caatinga	1.6593	0.8896	2.563
Cryptanthoids	Cladogenetic	In situ speciation	Caatinga	1.4807	0.7933	2.4787
Cryptanthoids	Cladogenetic	In situ speciation	Caatinga	1.1224	0.3729	2.0459
Cryptanthoids	Cladogenetic	Shifts from the Caatinga	Cerrado + Pampas	0.6031	0.0719	1.4245
Cryptanthoids	Anagenetic	Shifts from the Caatinga	Cerrado + Pampas	0.4822	0.0622	1.1332
Cnidoscolus	Cladogenetic	Vicariance	North America	2.7258	0.9799	4.6562
Cnidoscolus	Cladogenetic	In situ speciation	Caatinga	1.9772	0.606	3.4211
Cnidoscolus	Anagenetic	Shifts from the Caatinga	Atlantic Forest	1.9772	0.606	3.4211
Cnidoscolus	Cladogenetic	In situ speciation	Caatinga	1.5883	0.4938	2.7787
Cnidoscolus	Cladogenetic	In situ speciation	Caatinga	1.1888	0.3834	2.1603
Cnidoscolus	Cladogenetic	In situ speciation	Caatinga	0.8878	0.2043	1.6976
Cnidoscolus	Cladogenetic	In situ speciation	Caatinga	0.6151	0.1432	1.2466
Cnidoscolus	Cladogenetic	In situ speciation	Caatinga	0.4716	0.0852	0.9934
Cnidoscolus	Anagenetic	Shifts from the Caatinga	Atlantic Forest	0.4716	0.0852	0.9934
Cnidoscolus	Cladogenetic	In situ speciation	Caatinga	0.1814	0	0.5562
Cnidoscolus	Cladogenetic	Shifts from the Caatinga	Cerrado + Pampas	1.002	0.2962	1.9062
Mimosa	Cladogenetic	Vicariance	Andes	12.2043	7.8327	17.5048
Mimosa	Anagenetic	Shifts from the Caatinga	Cerrado + Pampas	9.0431	5.5701	13.122
Mimosa	Cladogenetic	Vicariance	Amazon	4.9993	2.7381	7.6057
Mimosa	Anagenetic	Shifts into the Caatinga	Cerrado + Pampas	1.9212	0.3777	4.3982
Mimosa	Anagenetic	Shifts into the Caatinga	Cerrado + Pampas	5.7297	3.4168	8.8788
Mimosa	Cladogenetic	Vicariance	Cerrado + Pampas	3.9233	1.9673	6.4876
Mimosa	Cladogenetic	In situ speciation	Caatinga	1.4538	0.3709	3.0172
Mimosa	Anagenetic	Shifts from the Caatinga	North America	1.4538	0.3709	3.0172
Mimosa	Anagenetic	Shifts from the Caatinga	Northern South America	1.4538	0.3709	3.0172
Mimosa	Cladogenetic	In situ speciation	Caatinga	2.8641	1.1601	5.0192
Mimosa	Cladogenetic	Shifts from the Caatinga	Chaco	2.0604	0.4009	4.1172
Mimosa	Anagenetic	Shifts into the Caatinga	Cerrado + Pampas	9.4227	6.0571	13.3863
Mimosa	Anagenetic	Shifts into the Caatinga	Cerrado + Pampas	4.1954	1.9817	7.232
Mimosa	Anagenetic	Shifts into the Caatinga	Cerrado + Pampas	9.159	5.8328	12.566
Mimosa	Cladogenetic	Vicariance	Cerrado + Pampas	4.5452	2.3249	7.5032
Mimosa	Cladogenetic	In situ speciation	Caatinga	2.4073	1.0264	4.3428
Mimosa	Cladogenetic	In situ speciation	Caatinga	1.878	0.5738	3.5993
Mimosa	Cladogenetic	Vicariance	Cerrado + Pampas	1.4671	0.3061	3.3344
Mimosa	Cladogenetic	Vicariance	Cerrado + Pampas	0.6885	0.0799	1.662
Mimosa	Cladogenetic	In situ speciation	Cerrado + Pampas	0.2972	0.0062	0.9016
Mimosa	Cladogenetic	In situ speciation	Cerrado + Pampas	0.1482	0.004	0.6638
Mimosa	Cladogenetic	Vicariance	Cerrado + Pampas	0.1422	0	0.642
Mimosa	Anagenetic	Shifts into the Caatinga	Cerrado + Pampas	5.7118	3.86	7.9196
Mimosa	Cladogenetic	In situ speciation	Caatinga	4.072	1.6911	6.5296
Mimosa	Anagenetic	Shifts from the Caatinga	North America	3.0862	1.0906	5.7377
Mimosa	Anagenetic	Shifts from the Caatinga	Northern South America	3.0862	1.0906	5.7377
Mimosa	Anagenetic	Shifts into the Caatinga	Cerrado + Pampas	1.6492	0.6871	2.7985
Mimosa	Cladogenetic	Shifts into the Caatinga	Cerrado + Pampas	0.6574	0.0922	1.5967
Mimosa	Anagenetic	Shifts into the Caatinga	Cerrado + Pampas	0.8611	0.1731	1.7816
Mimosa	Anagenetic	Shifts into the Caatinga	Cerrado + Pampas	5.241	3.1984	7.6259
Mimosa	Cladogenetic	Vicariance	Cerrado + Pampas	3.6391	1.6247	5.8767
Mimosa	Anagenetic	Shifts from the Caatinga	North America	3.6391	1.6247	5.8767
Mimosa	Cladogenetic	Vicariance	Cerrado + Pampas	1.2987	0.2227	2.9048
